# Supplementary material for: Axial-phenyl-constrained bis(imino)acenaphthene-nickel precatalysts enhance ethylene polymerization
Source: Royal Society of Chemistry journal article supplement (doi:10.1039/d4py01110d), 2024-01-01
Supplement: d4py01110d1.pdf [file d4py01110d1.pdf]

## Supplementary Information

For

### **Axial-phenyl Constrained Bis(imino)acenaphthene-Nickel Precatalysts Enhancing Ethylene Polymerization**

Quanchao Wang,<sup>a,b</sup> Qiuyue Zhang,<sup>a</sup> Yizhou Wang,<sup>a,b</sup> Song Zou,<sup>a</sup> Yanping Ma,<sup>a</sup> Tongling Liang,<sup>a</sup>  
and Wen-Hua Sun<sup>\*a,b</sup>

<sup>a</sup> Key Laboratory of Engineering Plastics and Beijing National Laboratory for Molecular Sciences,  
Institute of Chemistry, Chinese Academy of Sciences, Beijing 100190, China.

<sup>b</sup> CAS Research/Education Center for Excellence in Molecular Sciences, University of  
Chinese Academy of Sciences, Beijing 100049, China

| Contents                                                                                                                                             | Pages |
|------------------------------------------------------------------------------------------------------------------------------------------------------|-------|
| <b>Figure S1.</b> FT-IR spectrum of <b>Ni1-Ni5</b> .                                                                                                 | S4    |
| <b>Figure S2.</b> <sup>1</sup> H NMR (400 MPa) spectrum of <b>Ni1</b> (recorded in CDCl <sub>3</sub> at 25 °C).                                      | S4    |
| <b>Figure S3.</b> <sup>1</sup> H NMR (400 MPa) spectrum of <b>Ni2</b> (recorded in CDCl <sub>3</sub> at 25 °C).                                      | S5    |
| <b>Figure S4.</b> <sup>1</sup> H NMR (400 MPa) spectrum of <b>Ni3</b> (recorded in CDCl <sub>3</sub> at 25 °C).                                      | S5    |
| <b>Figure S5.</b> <sup>1</sup> H NMR (400 MPa) spectrum of <b>Ni4</b> (recorded in CDCl <sub>3</sub> at 25 °C).                                      | S6    |
| <b>Figure S6.</b> <sup>1</sup> H NMR (400 MPa) spectrum of <b>Ni5</b> (recorded in CDCl <sub>3</sub> at 25 °C).                                      | S6    |
| <b>Figure S7.</b> <sup>1</sup> H NMR (500 MPa) spectrum of <b>Ni2</b> (recorded in C <sub>6</sub> D <sub>4</sub> Cl <sub>2</sub> at 25 °C).          | S7    |
| <b>Figure S8.</b> <sup>1</sup> H NMR (500 MPa) spectrum of <b>Ni2</b> (recorded in C <sub>6</sub> D <sub>4</sub> Cl <sub>2</sub> at 40 °C).          | S7    |
| <b>Figure S9.</b> <sup>1</sup> H NMR (500 MPa) spectrum of <b>Ni2</b> (recorded in C <sub>6</sub> D <sub>4</sub> Cl <sub>2</sub> at 60 °C).          | S8    |
| <b>Figure S10.</b> <sup>1</sup> H NMR (500 MPa) spectrum of <b>Ni2</b> (recorded in C <sub>6</sub> D <sub>4</sub> Cl <sub>2</sub> at 80 °C).         | S8    |
| <b>Figure S11.</b> <sup>1</sup> H NMR (500 MPa) spectrum of <b>Ni2</b> (recorded in C <sub>6</sub> D <sub>4</sub> Cl <sub>2</sub> at 100 °C).        | S9    |
| <b>Figure S12.</b> DSC spectrum of the polyethylenes obtained at different polymerization temperatures using MMAO or EASC as cocatalyst.             | S9    |
| <b>Figure S13.</b> DSC spectrum of amorphous polyethylenes.                                                                                          | S10   |
| <b>Figure S14.</b> GPC traces of the polyethylenes produced by <b>Ni2</b> /EASC.                                                                     | S10   |
| <b>Figure S15.</b> The structures of <b>Ni13</b> , <b>Ni8</b> , <b>Ni2</b> and <b>Ni3</b> and the value of their buried volume (%V <sub>Bur</sub> ). | S11   |
| <b>Figure S16.</b> Topographical stereograms of <b>Ni3 (a)</b> and <b>Ni2 (b)</b> .                                                                  | S11   |
| <b>Figure S17.</b> <sup>13</sup> C NMR (125 MPa) spectrum of <b>PE<sub>Ni2-60-M1</sub></b> .                                                         | S12   |
| <b>Figure S18.</b> <sup>13</sup> C NMR (125 MPa) spectrum of <b>PE<sub>Ni2-80-M1</sub></b> .                                                         | S12   |
| <b>Figure S19.</b> <sup>13</sup> C NMR (125 MPa) spectrum of <b>PE<sub>Ni2-60-E5</sub></b> .                                                         | S13   |
| <b>Figure S20.</b> <sup>13</sup> C NMR (125 MPa) spectrum of <b>PE<sub>Ni2-80-E5</sub></b> .                                                         | S13   |
| <b>Figure S21.</b> <sup>13</sup> C NMR (125 MPa) spectrum of <b>PE<sub>Ni2-100-E5</sub></b> .                                                        | S14   |
| <b>Figure S22.</b> <sup>13</sup> C NMR (125 MPa) spectrum of <b>PE<sub>Ni2-60-E2</sub></b> .                                                         | S14   |
| <b>Figure S23.</b> <sup>13</sup> C NMR (125 MPa) spectrum of <b>PE<sub>Ni1-60-E2</sub></b> .                                                         | S15   |
| <b>Figure S24.</b> <sup>13</sup> C NMR (125 MPa) spectrum of <b>PE<sub>Ni3-60-E2</sub></b> .                                                         | S15   |
| <b>Figure S25.</b> <sup>13</sup> C NMR (125 MPa) spectrum of <b>PE<sub>Ni4-60-E2</sub></b> .                                                         | S16   |
| <b>Figure S26.</b> <sup>13</sup> C NMR (125 MPa) spectrum of <b>PE<sub>Ni5-60-E2</sub></b> .                                                         | S16   |
| <b>Figure S27.</b> <sup>13</sup> C NMR (125 MPa) spectrum of <b>PE<sub>Ni6-60-E2</sub></b> .                                                         | S17   |

|                                                                                                      |     |
|------------------------------------------------------------------------------------------------------|-----|
| <b>Figure S28.</b> $^{13}\text{C}$ NMR (125 MPa) spectrum of $\text{PE}_{\text{Ni}7-60-\text{E}2}$ . | S17 |
| <b>Figure S29.</b> $^{13}\text{C}$ NMR (125 MPa) spectrum of $\text{PE}_{\text{Ni}8-60-\text{E}2}$ . | S18 |
| <b>Table S1.</b> Crystal data and structure refinement of <b>Ni2</b> and <b>Ni3</b> .                | S19 |
| <b>Table S2.</b> Peak assignments of $^{13}\text{C}$ NMR spectrum of the polyethylenes               | S20 |
| <b>Table S3.</b> Branching analysis of selected samples of polyethylenes.                            | S21 |
| <b>Table S4.</b> Stress-strain properties of the selected polyethylene samples.                      | S22 |

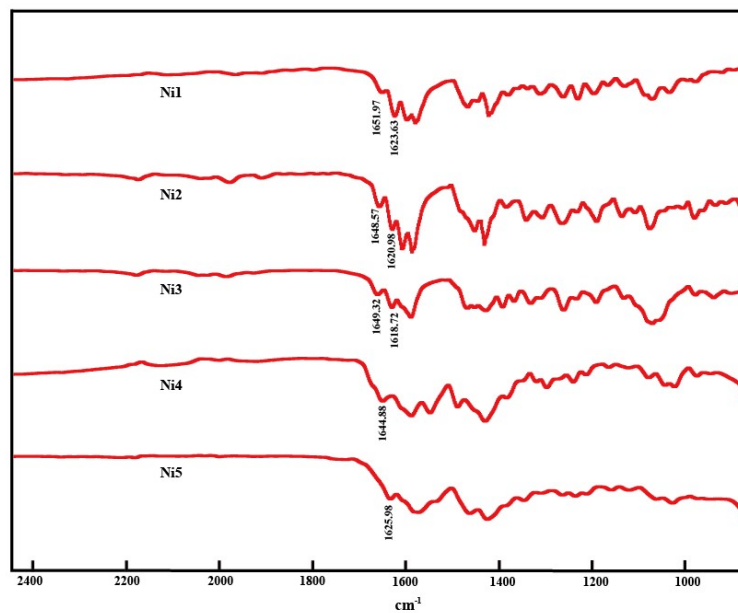

Figure S1. FT-IR spectrum of Ni1-Ni5.

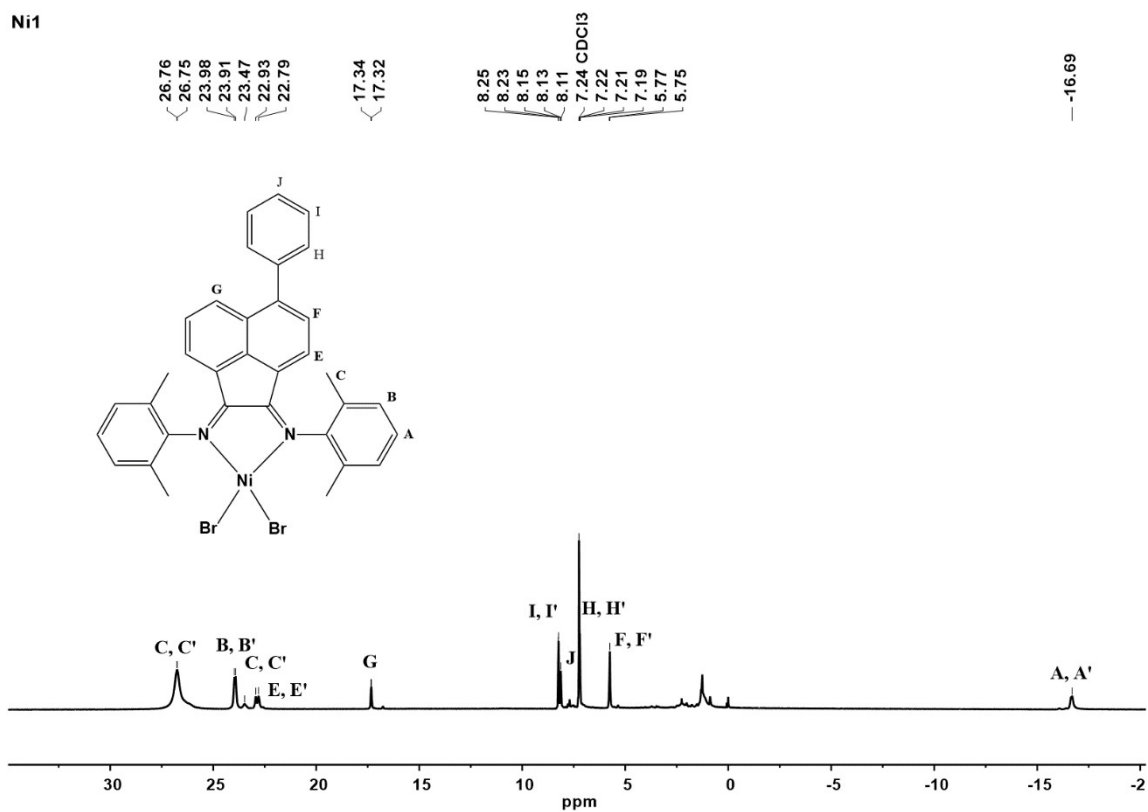

Figure S2.  $^1\text{H}$  NMR (400 MPa) spectrum of Ni1 (recorded in  $\text{CDCl}_3$  at 25 °C).

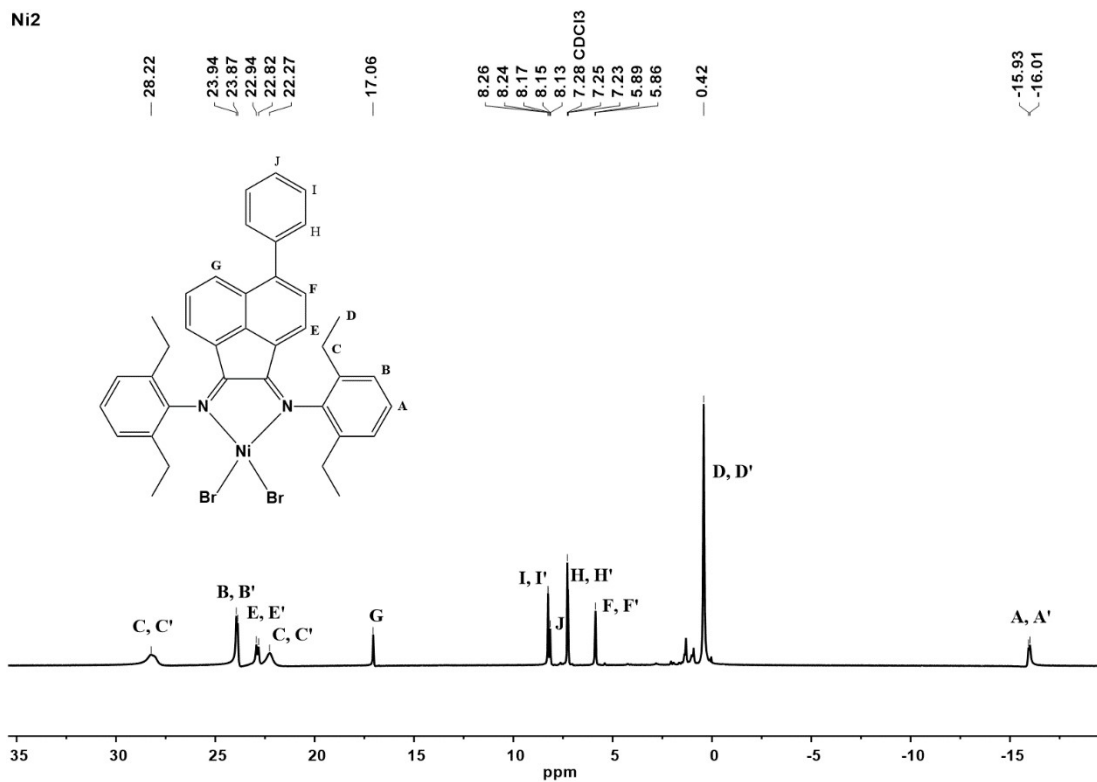

**Figure S3.** <sup>1</sup>H NMR (400 MPa) spectrum of **Ni2** (recorded in CDCl<sub>3</sub> at 25 °C).

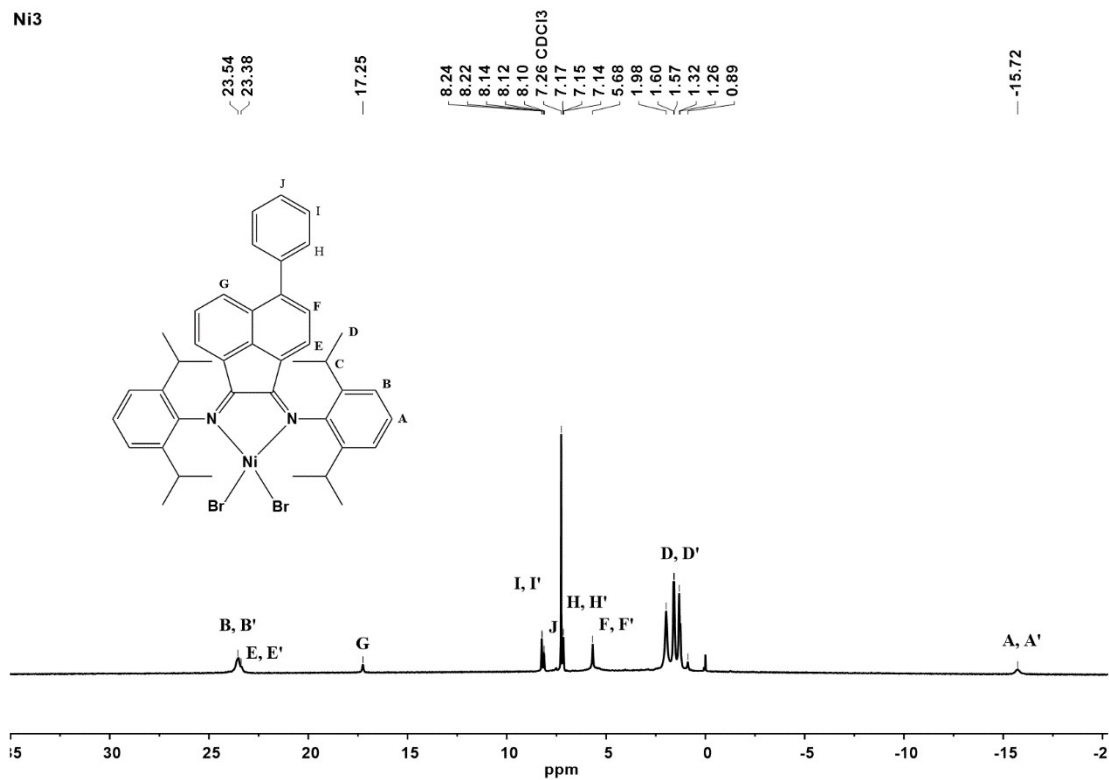

**Figure S4.** <sup>1</sup>H NMR (400 MPa) spectrum of **Ni3** (recorded in CDCl<sub>3</sub> at 25 °C).

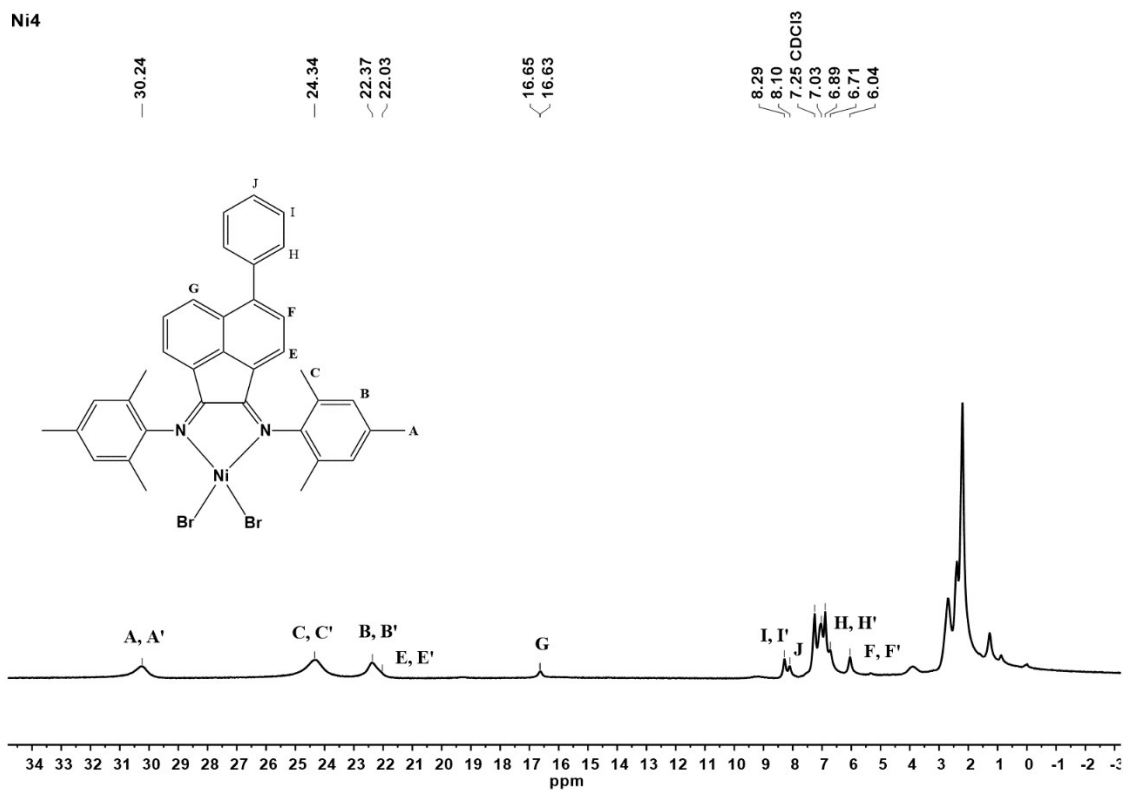

Figure S5.  $^1\text{H}$  NMR (400 MPa) spectrum of Ni4 (recorded in  $\text{CDCl}_3$  at 25 °C).

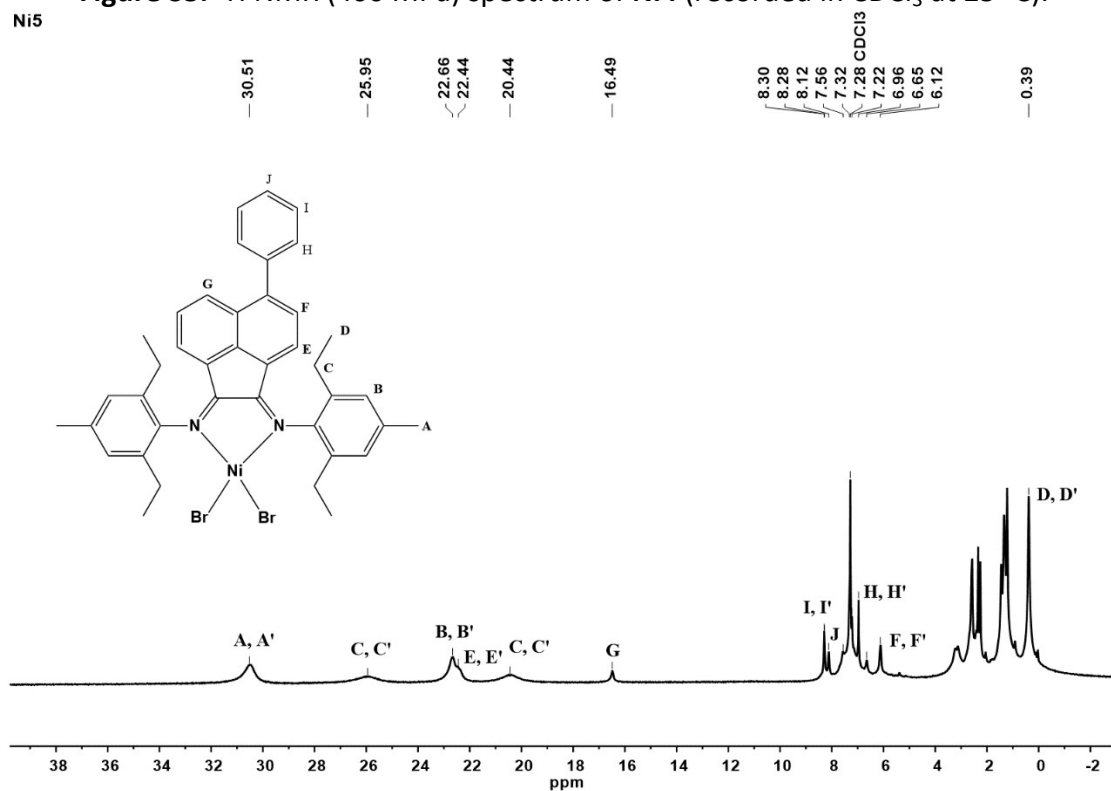

Figure S6.  $^1\text{H}$  NMR (400 MPa) spectrum of Ni5 (recorded in  $\text{CDCl}_3$  at 25 °C).

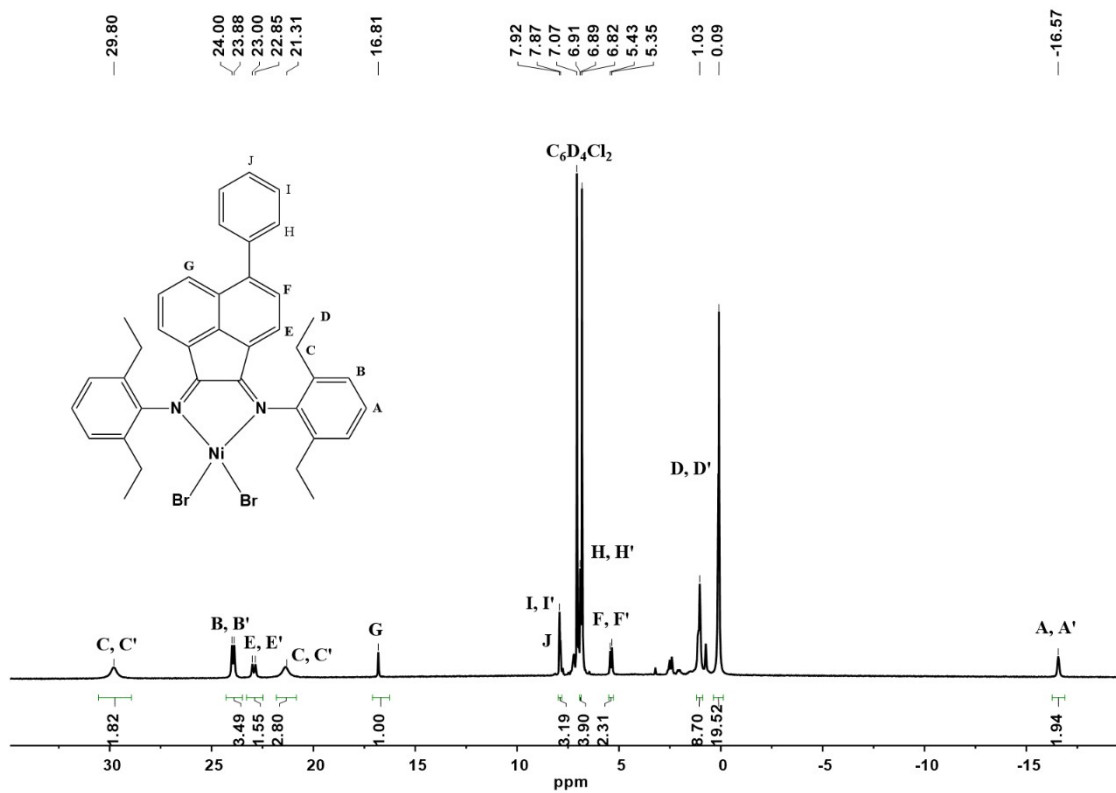

Figure S7. <sup>1</sup>H NMR (500 MPa) spectrum of Ni2 (recorded in C<sub>6</sub>D<sub>4</sub>Cl<sub>2</sub> at 25 °C).

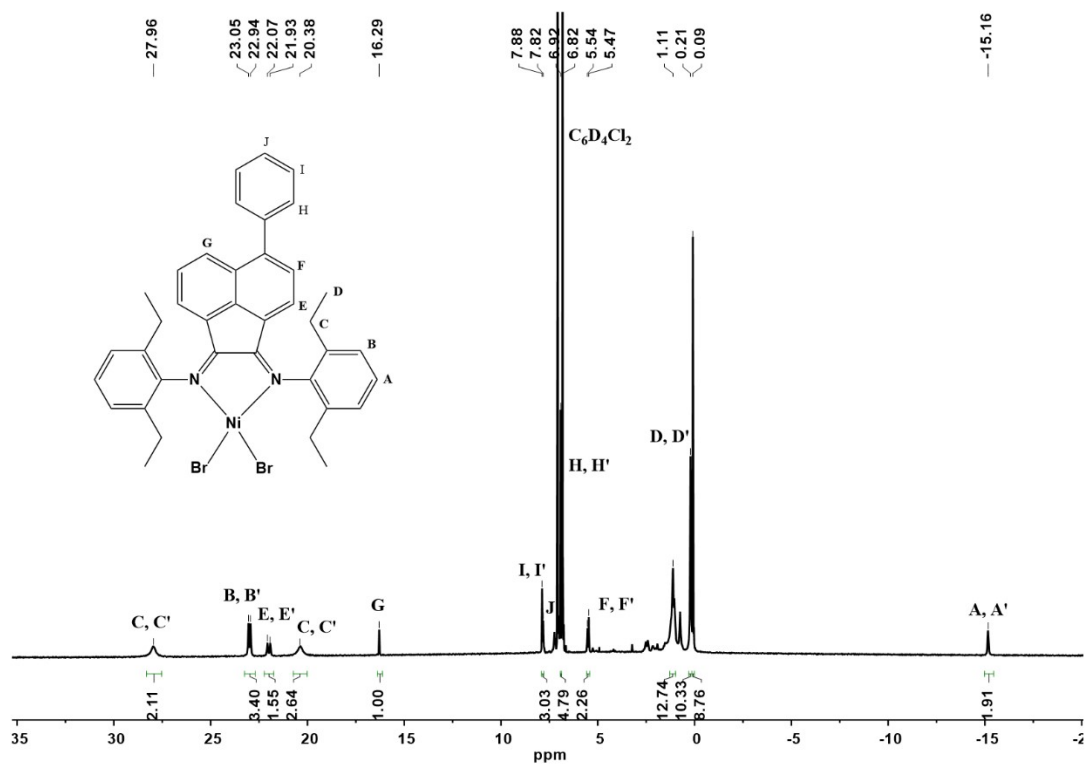

Figure S8. <sup>1</sup>H NMR (500 MPa) spectrum of Ni2 (recorded in C<sub>6</sub>D<sub>4</sub>Cl<sub>2</sub> at 40 °C).

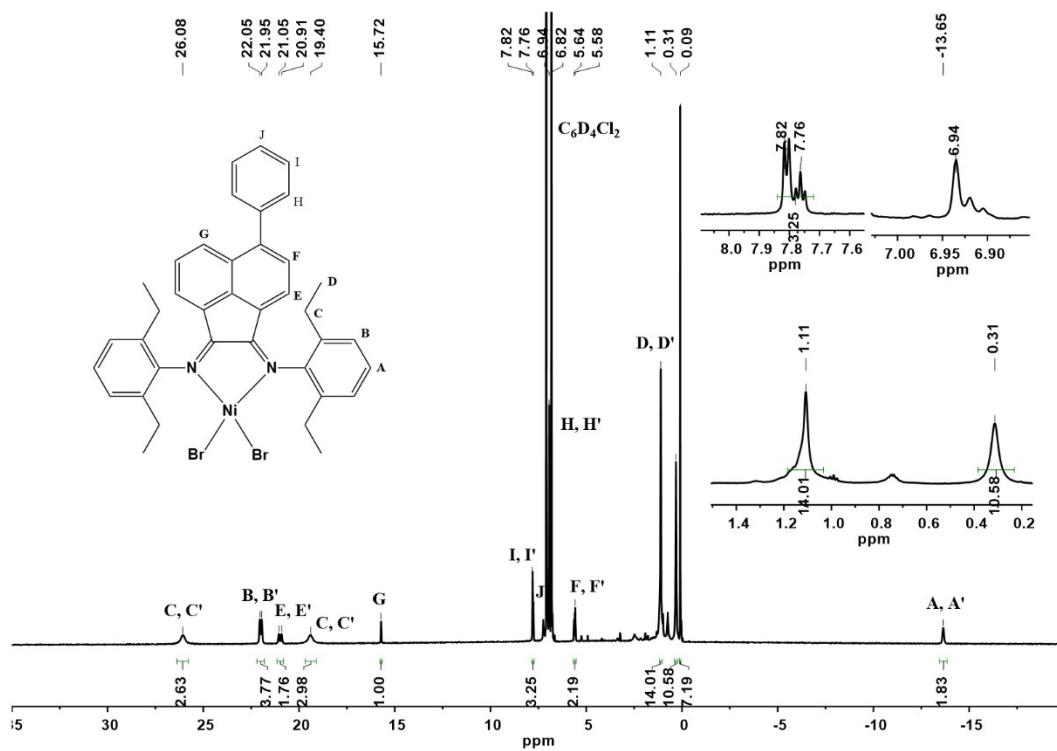

Figure S9.  $^1\text{H}$  NMR (500 MPa) spectrum of **Ni2** (recorded in  $\text{C}_6\text{D}_4\text{Cl}_2$  at  $60^\circ\text{C}$ ).

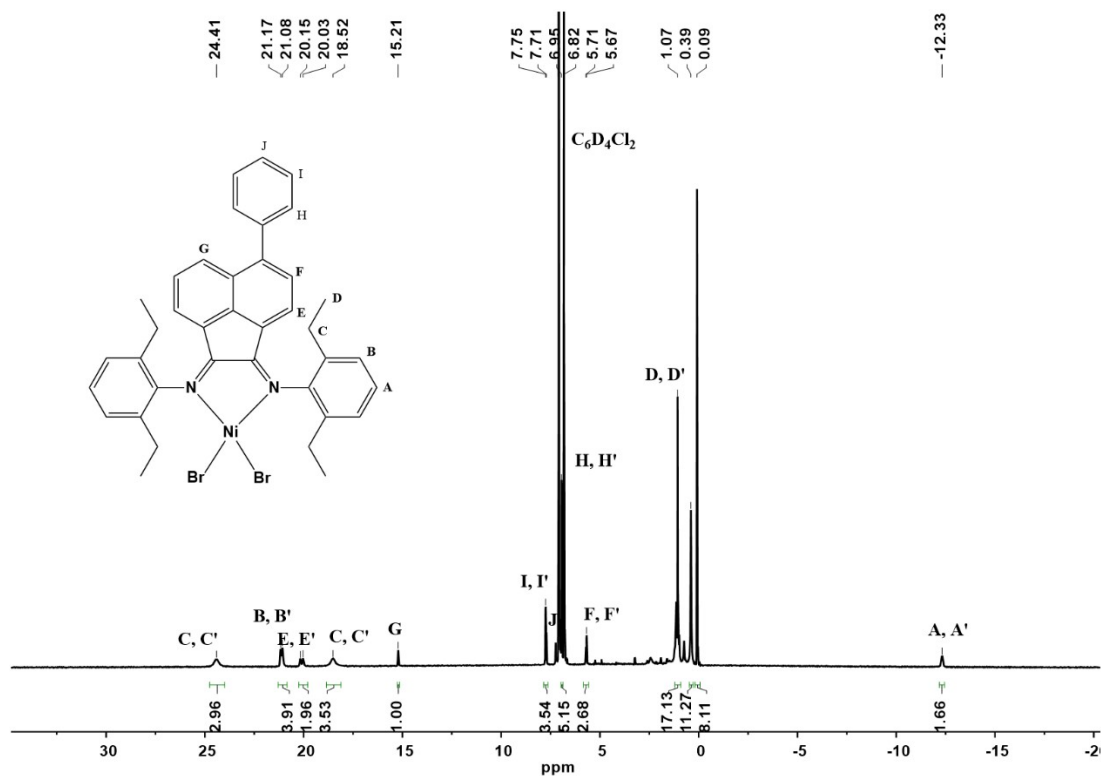

Figure S10.  $^1\text{H}$  NMR (500 MPa) spectrum of **Ni2** (recorded in  $\text{C}_6\text{D}_4\text{Cl}_2$  at  $80^\circ\text{C}$ ).



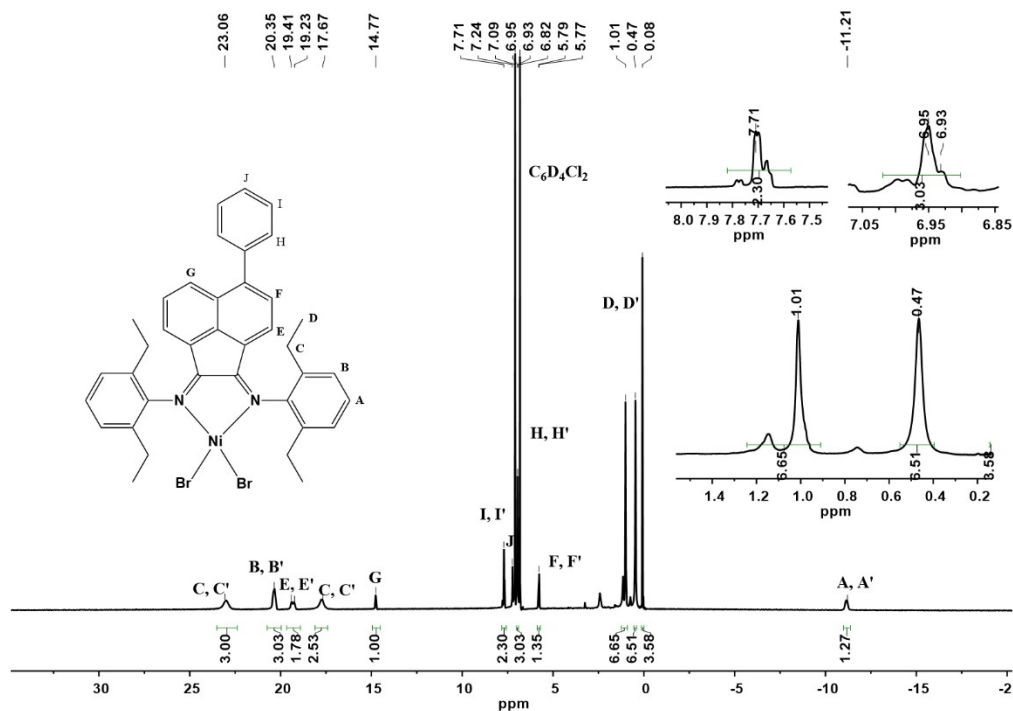

**Figure S11.** <sup>1</sup>H NMR (500 MPa) spectrum of Ni2 (recorded in C<sub>6</sub>D<sub>4</sub>Cl<sub>2</sub> at 100 °C).

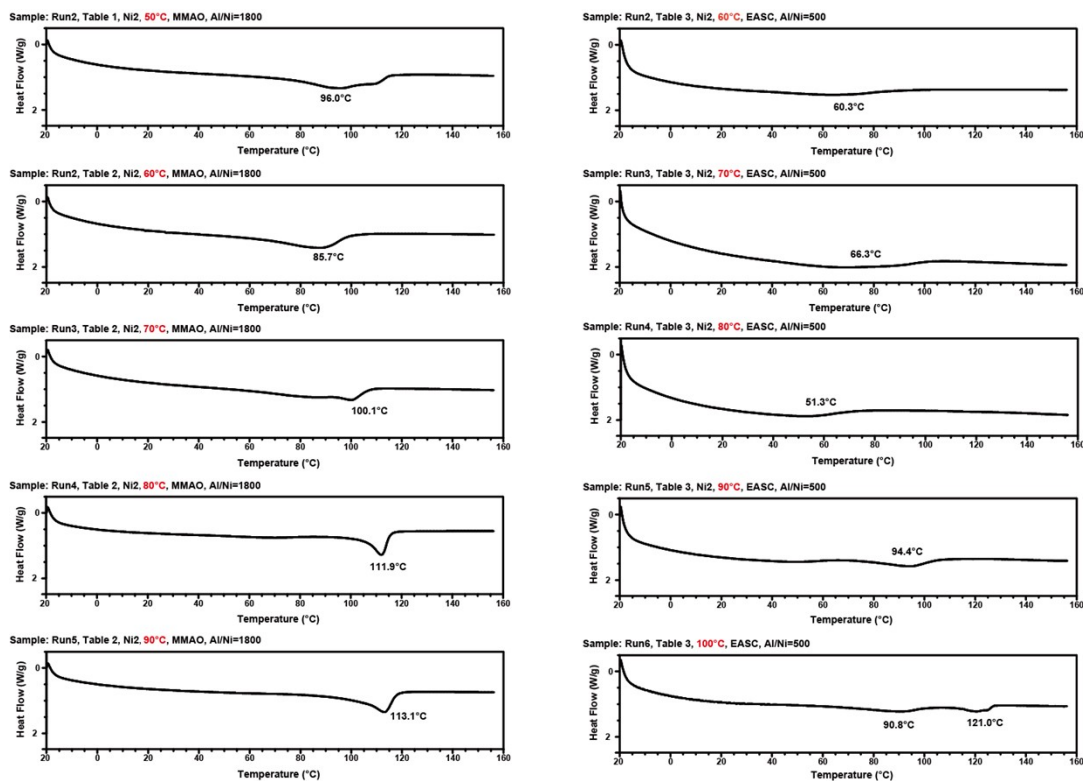

**Figure S12.** DSC spectrum of the polyethylenes obtained at different polymerization temperatures using MMAO or EASC as cocatalyst.

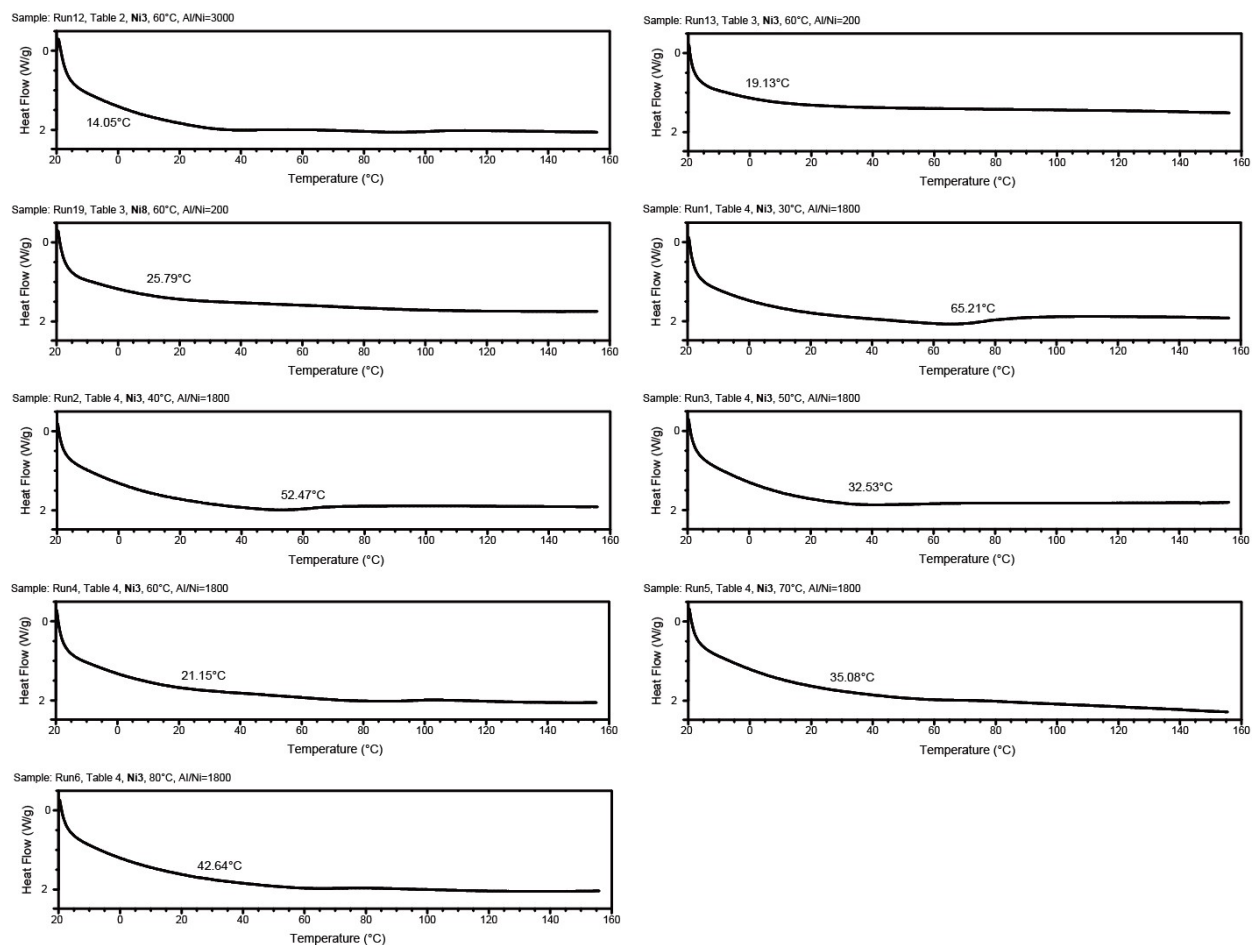

**Figure S13.** DSC spectrum of amorphous polyethylenes.

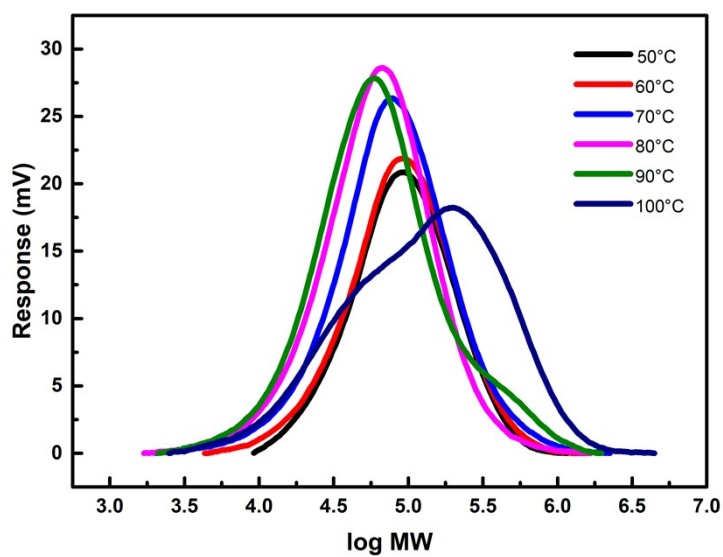

**Figure S14.** GPC traces of the polyethylenes produced by Ni<sub>2</sub>/EASC (Run 1-6, Table 3).

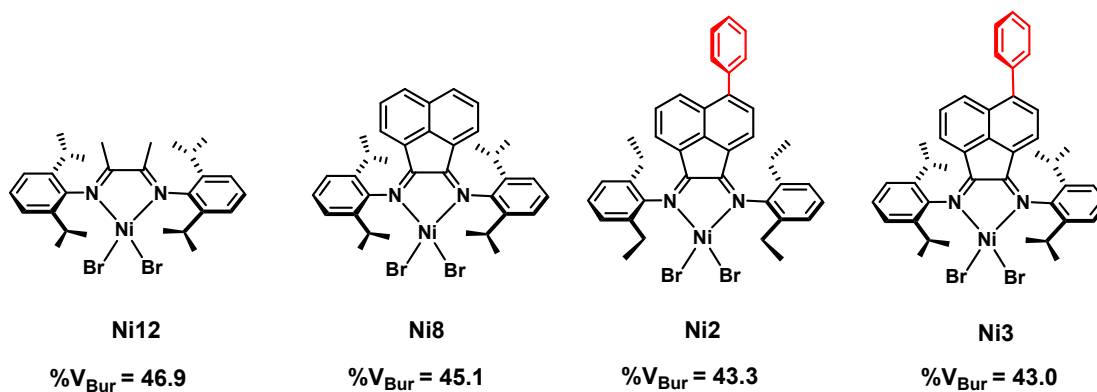

The stronger the skeleton rigidity, the lower the buried volume value

Rotation suppression of N-aryl group

**Figure S15.** The structures of **Ni9**, **Ni8**, **Ni2** and **Ni3** and their value of the buried volume ( $\%V_{\text{Bur}}$ ).

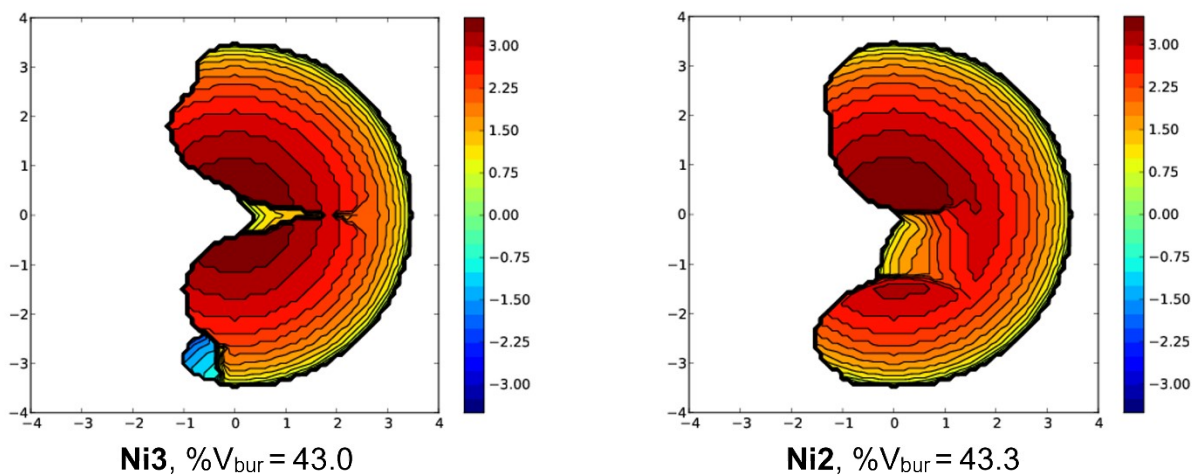

**Figure S16.** Topographical stereograms of **Ni3** and **Ni2**.

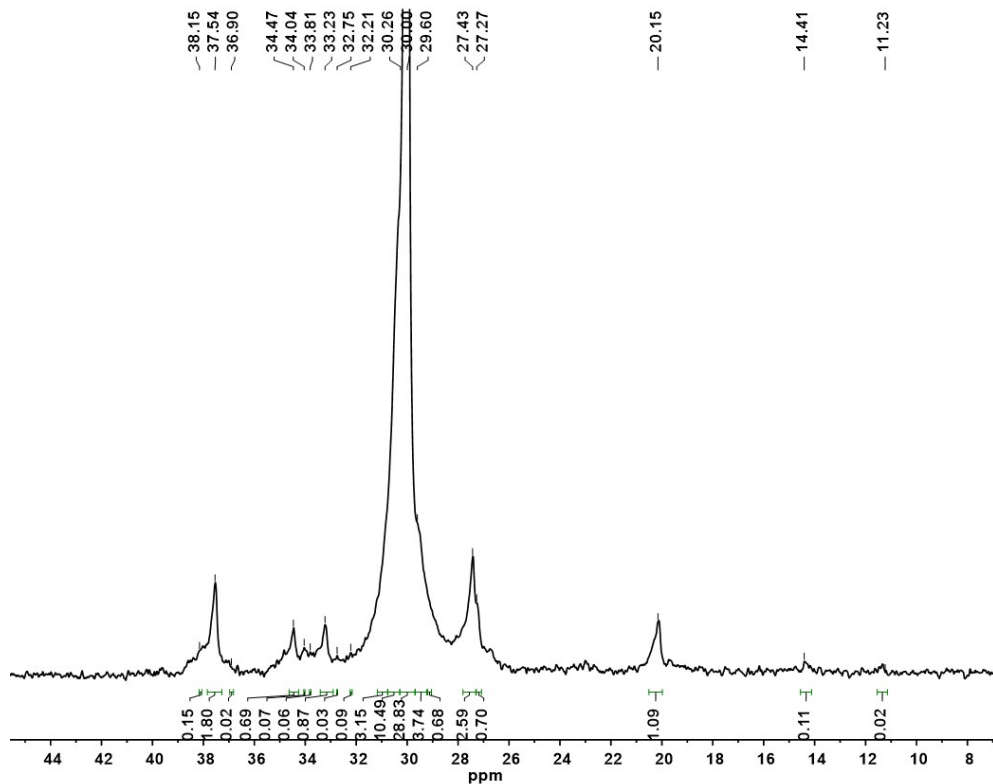

**Figure S17.**  $^{13}\text{C}$  NMR (125 MPa) spectrum of  $\text{PE}_{\text{Ni}2-60-\text{M}1}$  (recorded in 1,1,2,2-tetrachloroethane- $d_2$  at 100 °C).

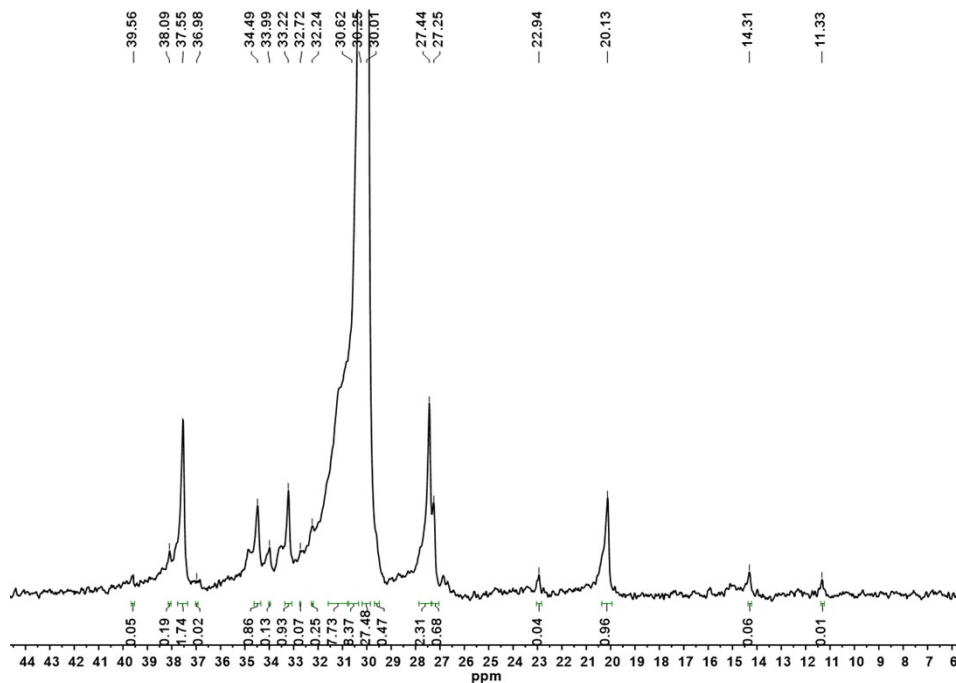

**Figure S18.**  $^{13}\text{C}$  NMR (125 MPa) spectrum of  $\text{PE}_{\text{Ni}2-80-\text{M}1}$  (recorded in 1,1,2,2-tetrachloroethane- $d_2$  at 100 °C).

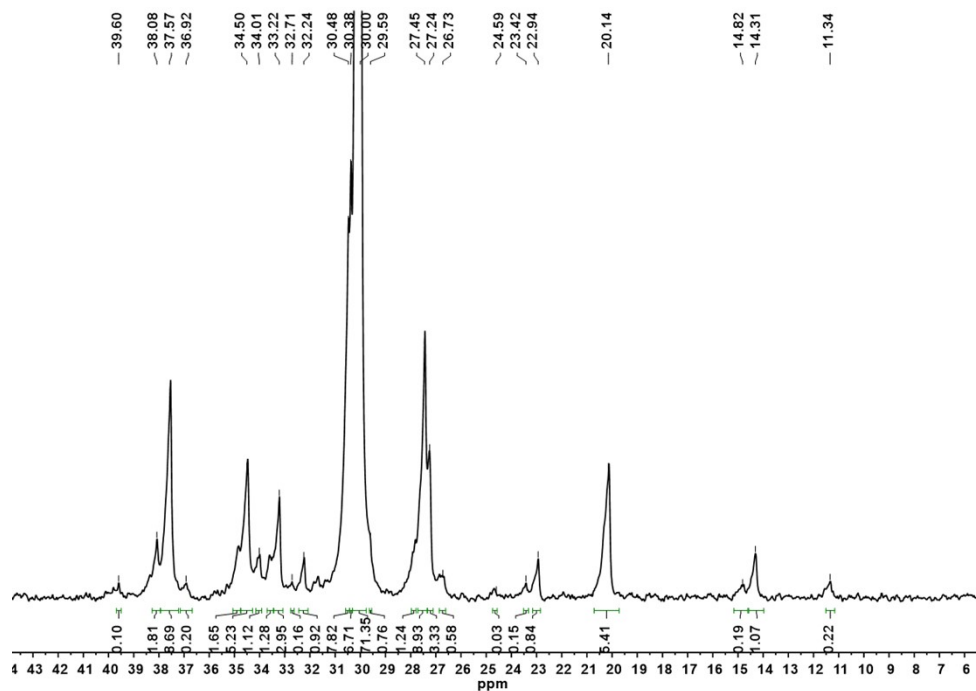

Figure S19.  $^{13}\text{C}$  NMR (125 MPa) spectrum of  $\text{PE}_{\text{Ni}2-60-\text{E}5}$  (recorded in 1,1,2,2-tetrachloroethane- $d_2$  at 100 °C).

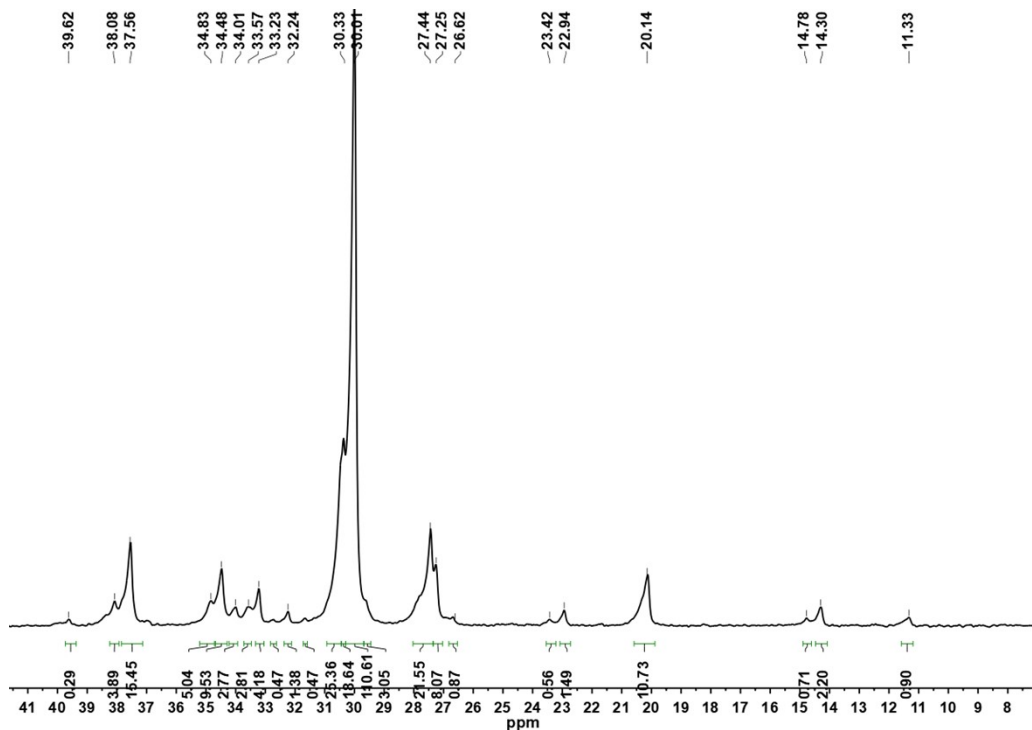

Figure S20.  $^{13}\text{C}$  NMR (125 MPa) spectrum of  $\text{PE}_{\text{Ni}2-80-\text{E}5}$  (recorded in 1,1,2,2-tetrachloroethane- $d_2$  at 100 °C).

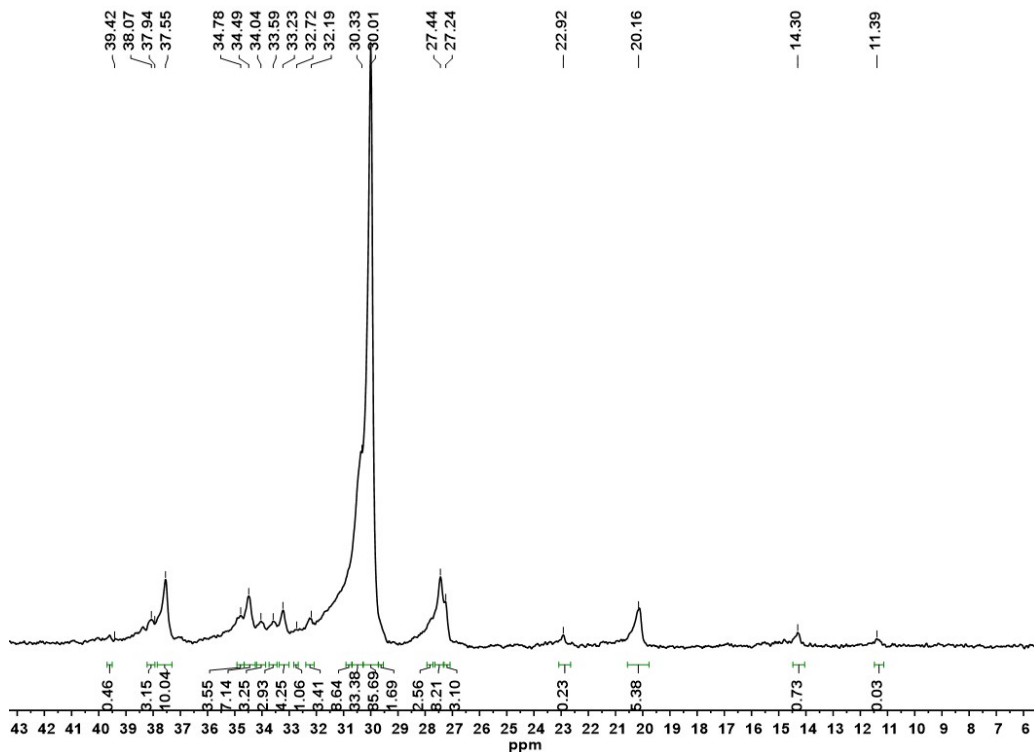

Figure S21.  $^{13}\text{C}$  NMR (125 MPa) spectrum of  $\text{PE}_{\text{Ni}2-100-\text{E}5}$  (recorded in 1,1,2,2-tetrachloroethane-

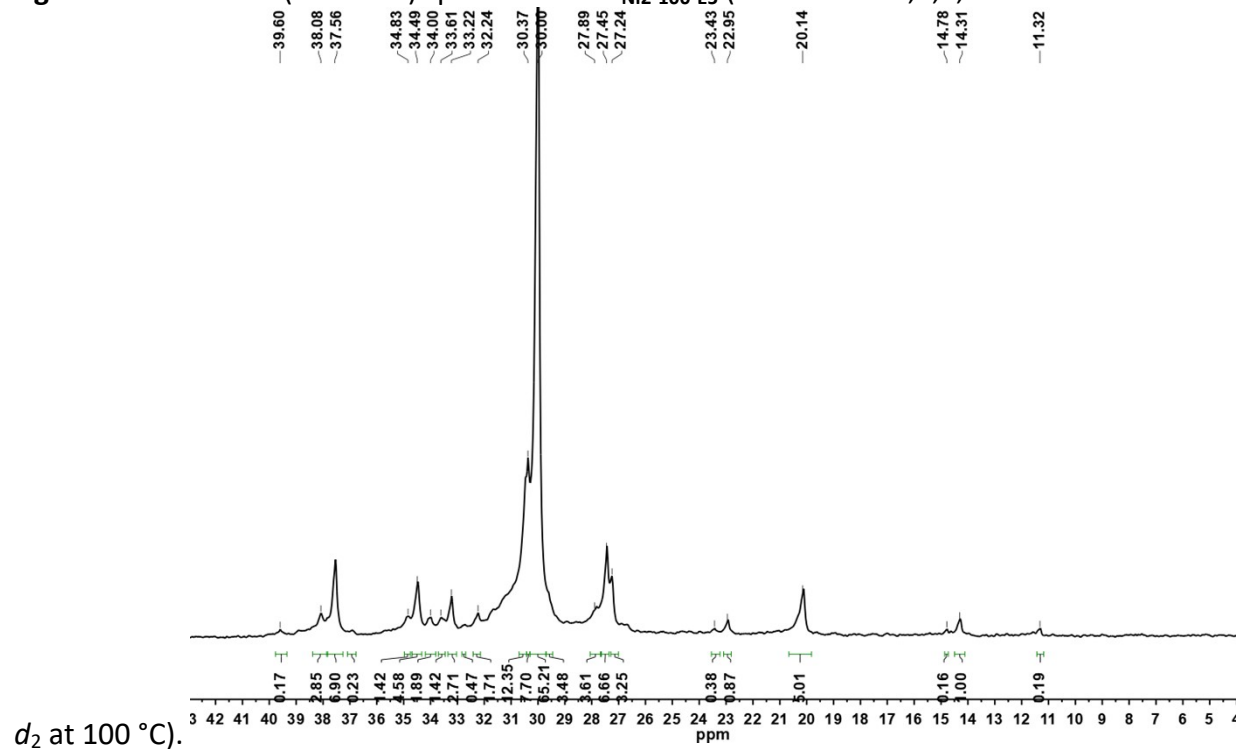

Figure S22.  $^{13}\text{C}$  NMR (125 MPa) spectrum of  $\text{PE}_{\text{Ni}2-60-\text{E}2}$  (recorded in 1,1,2,2-tetrachloroethane- $d_2$  at 100 °C).

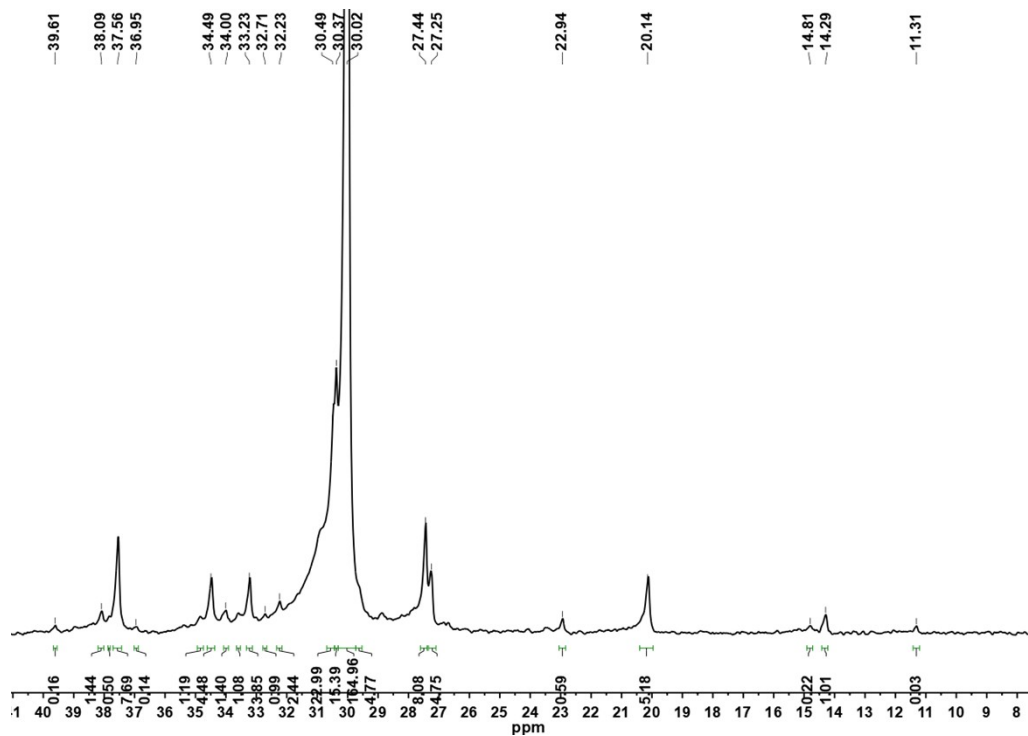

Figure S23.  $^{13}\text{C}$  NMR (125 MPa) spectrum of  $\text{PE}_{\text{Ni}1-60-\text{E}2}$  (recorded in 1,1,2,2-tetrachloroethane- $d_2$  at 100 °C).

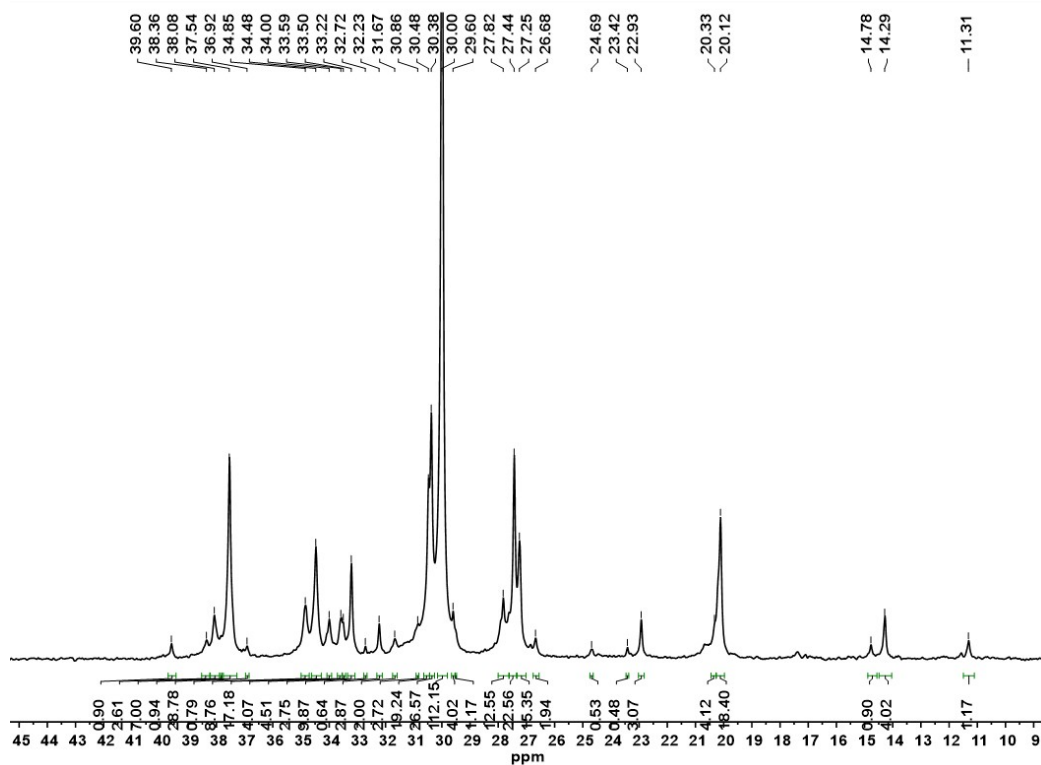

Figure S24.  $^{13}\text{C}$  NMR (125 MPa) spectrum of  $\text{PE}_{\text{Ni}3-60-\text{E}2}$  (recorded in 1,1,2,2-tetrachloroethane- $d_2$  at 100 °C).

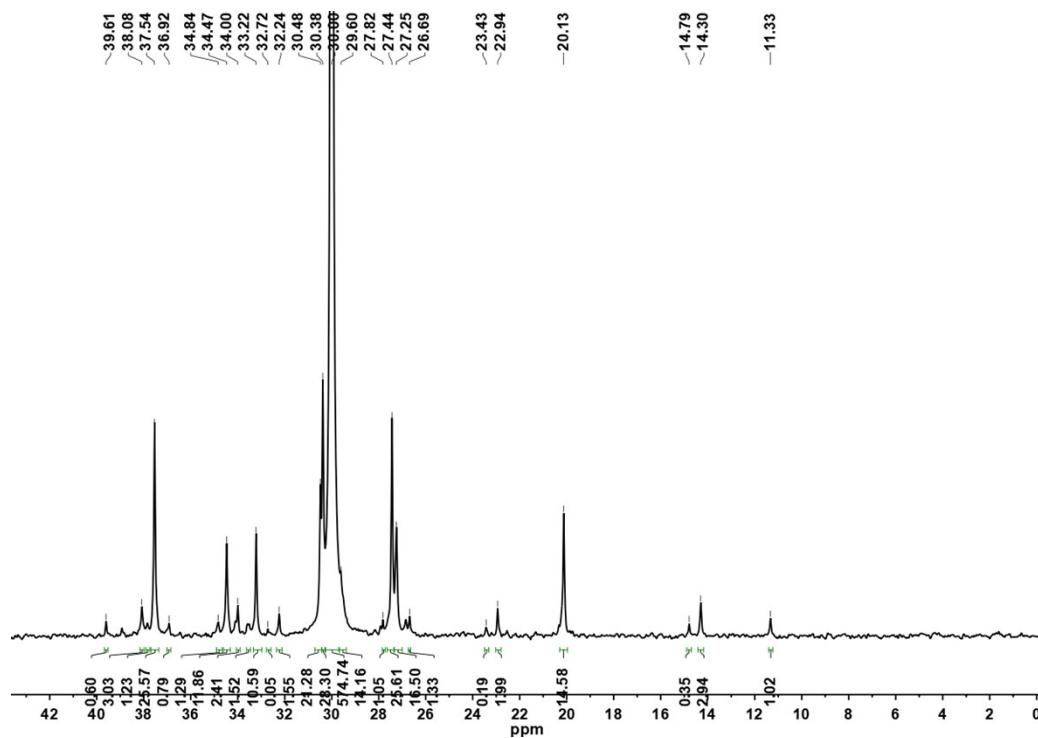

Figure S25.  $^{13}\text{C}$  NMR (125 MPa) spectrum of  $\text{PE}_{\text{Ni}4-60-\text{E}2}$  (recorded in 1,1,2,2-tetrachloroethane- $d_2$  at 100 °C).

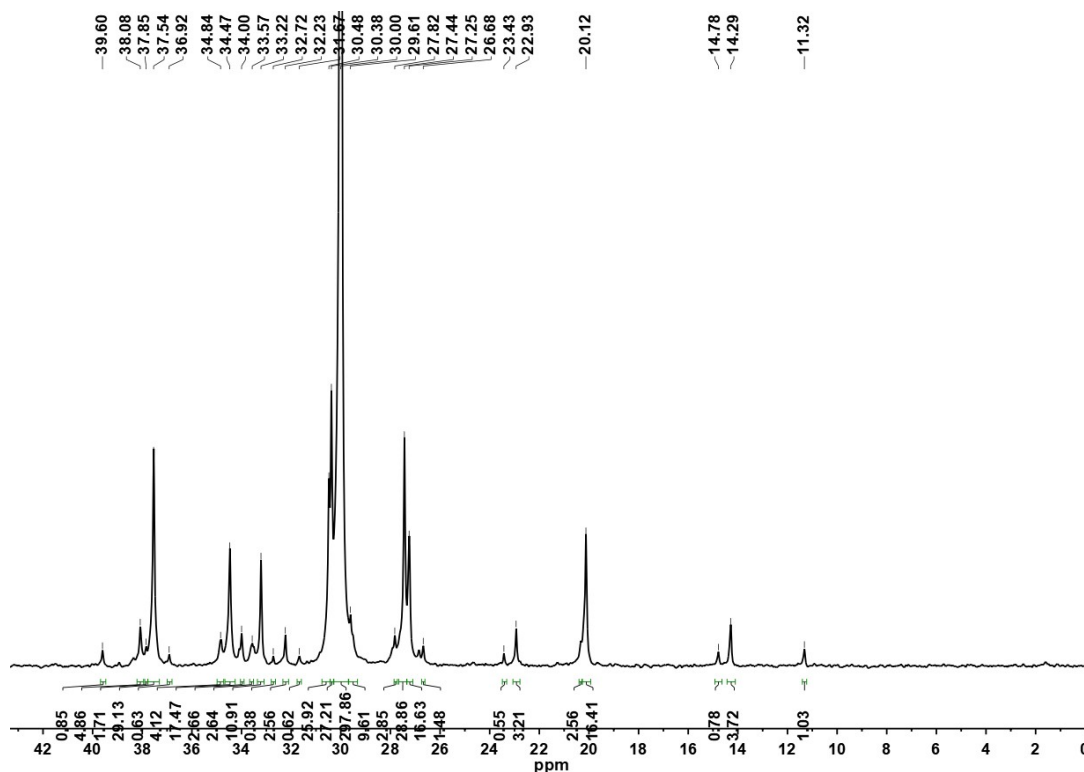

Figure S26.  $^{13}\text{C}$  NMR (125 MPa) spectrum of  $\text{PE}_{\text{Ni}5-60-\text{E}2}$  (recorded in 1,1,2,2-tetrachloroethane- $d_2$  at 100 °C).



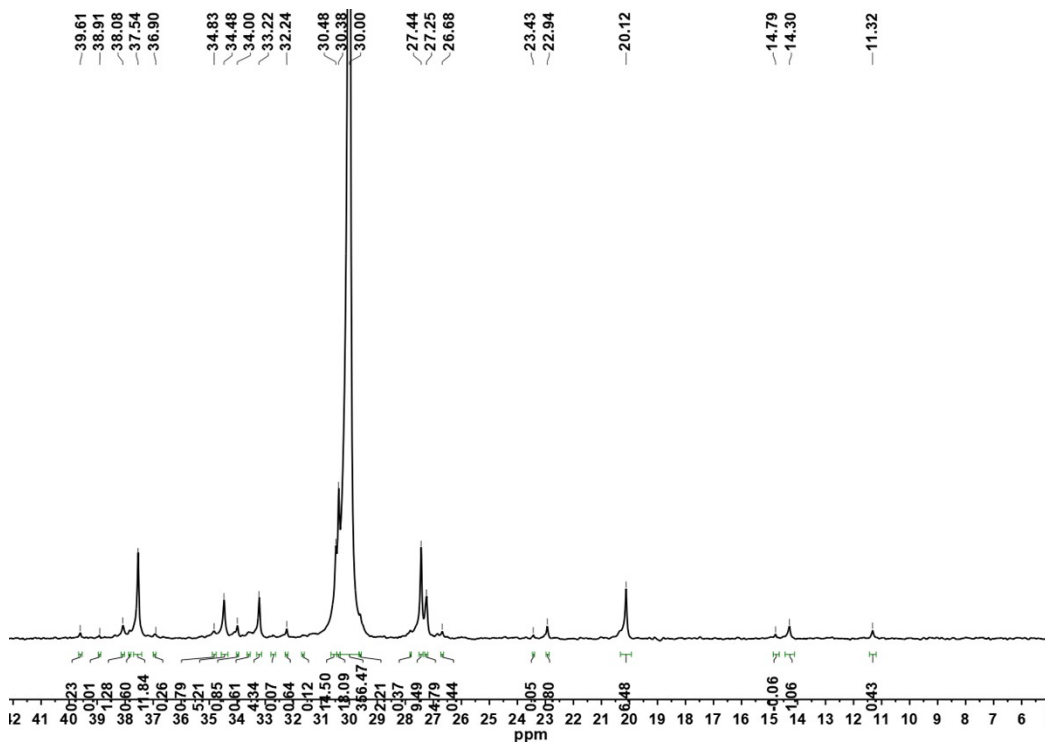

Figure S27.  $^{13}\text{C}$  NMR (125 MPa) spectrum of  $\text{PE}_{\text{Ni6-60-E2}}$  (recorded in 1,1,2,2-tetrachloroethane- $d_2$  at 100 °C).

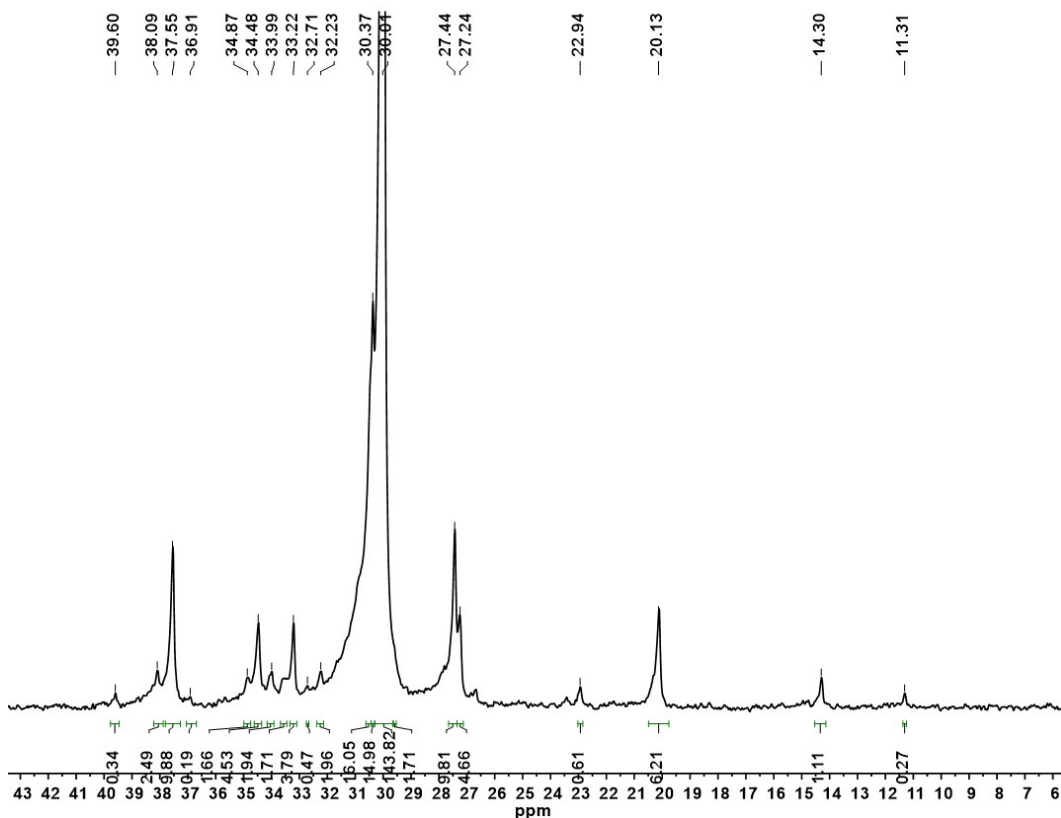

Figure S28.  $^{13}\text{C}$  NMR (125 MPa) spectrum of  $\text{PE}_{\text{Ni7-60-E2}}$  (recorded in 1,1,2,2-tetrachloroethane- $d_2$  at 100 °C).

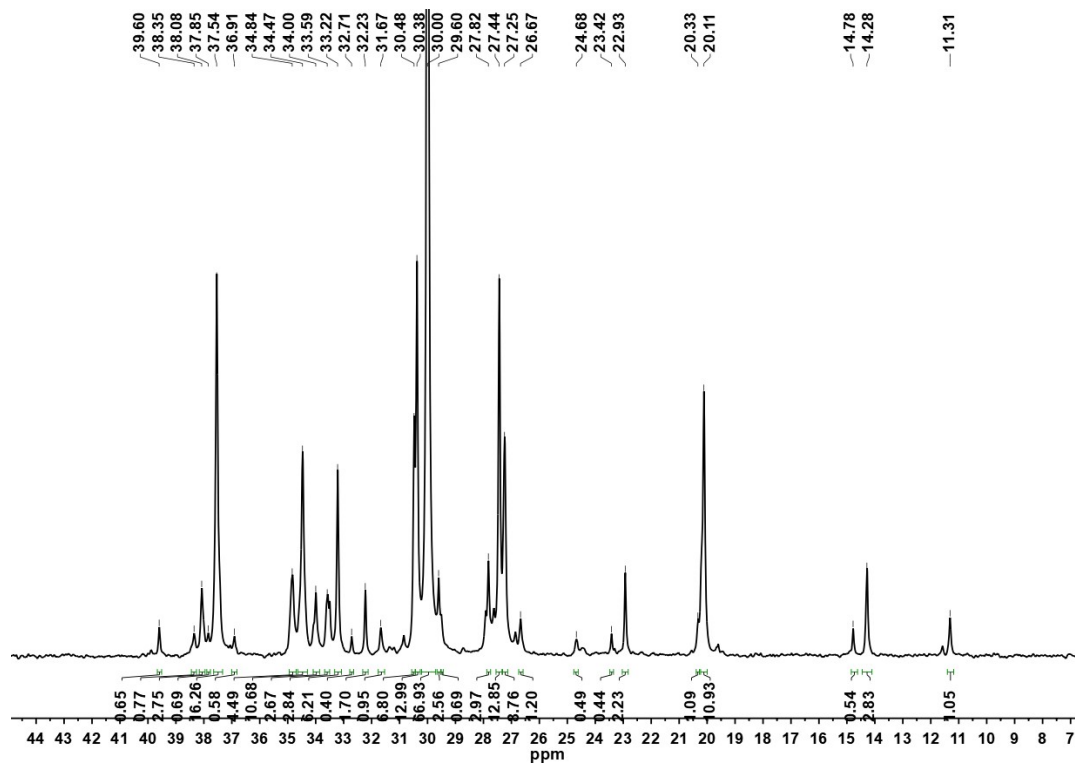

Figure S29.  $^{13}\text{C}$  NMR (125 MPa) spectrum of  $\text{PE}_{\text{Ni8-60-E2}}$  (recorded in 1,1,2,2-tetrachloroethane- $d_2$  at 100 °C).

**Table S1.** Crystal data and structure refinement of **Ni2** and **Ni3**.

|                                             | <b>Ni2</b>                                                        | <b>Ni3</b>                                                                     |
|---------------------------------------------|-------------------------------------------------------------------|--------------------------------------------------------------------------------|
| CCDC number                                 | 2331173                                                           | 2331174                                                                        |
| Empirical formula                           | C <sub>38</sub> H <sub>36</sub> Br <sub>2</sub> N <sub>2</sub> Ni | C <sub>84</sub> H <sub>88</sub> Br <sub>4</sub> N <sub>4</sub> Ni <sub>2</sub> |
| Formula weight                              | 739.22                                                            | 1590.64                                                                        |
| Temperature/K                               | 169.96(13)                                                        | 169.98(11)                                                                     |
| Crystal system                              | monoclinic                                                        | triclinic                                                                      |
| Space group                                 | P2 <sub>1</sub> /n                                                | P-1                                                                            |
| a/Å                                         | 12.9593(8)                                                        | 10.1206(4)                                                                     |
| b/Å                                         | 15.7707(6)                                                        | 11.7415(6)                                                                     |
| c/Å                                         | 17.4731(10)                                                       | 18.2647(5)                                                                     |
| α/°                                         | 90                                                                | 100.897(3)                                                                     |
| β/°                                         | 110.829(7)                                                        | 90.722(3)                                                                      |
| γ/°                                         | 90                                                                | 104.200(4)                                                                     |
| Volume/Å <sup>3</sup>                       | 3337.7(3)                                                         | 2062.19(15)                                                                    |
| Z                                           | 4                                                                 | 1                                                                              |
| ρ <sub>calc</sub> g/cm <sup>3</sup>         | 1.471                                                             | 1.281                                                                          |
| μ/mm <sup>-1</sup>                          | 3.852                                                             | 3.153                                                                          |
| F(000)                                      | 1504.0                                                            | 816.0                                                                          |
| Crystal size/mm <sup>3</sup>                | 0.1 × 0.06 × 0.05                                                 | 0.15 × 0.08 × 0.05                                                             |
| Radiation                                   | Cu Kα (λ = 1.54184)                                               | Cu Kα (λ = 1.54184)                                                            |
| 2θ range for data collection/°              | 7.794 to 152.49                                                   | 7.924 to 151.494                                                               |
| Index ranges                                | -16 ≤ h ≤ 16, -18 ≤ k ≤ 19, -20 ≤ l ≤ 20                          | -12 ≤ h ≤ 12, -14 ≤ k ≤ 13, -22 ≤ l ≤ 22                                       |
| Reflections collected                       | 23084                                                             | 24318                                                                          |
| Independent reflections                     | 6489 [R <sub>int</sub> = 0.0513, R <sub>sigma</sub> = 0.0368]     | 8177 [R <sub>int</sub> = 0.0618, R <sub>sigma</sub> = 0.0563]                  |
| Data/restraints/parameters                  | 6489/751/578                                                      | 8177/0/432                                                                     |
| Goodness-of-fit on F <sup>2</sup>           | 1.094                                                             | 1.033                                                                          |
| Final R indexes [I ≥ 2σ (I)]                | R <sub>1</sub> = 0.1258, wR <sub>2</sub> = 0.2328                 | R <sub>1</sub> = 0.0723, wR <sub>2</sub> = 0.1817                              |
| Final R indexes [all data]                  | R <sub>1</sub> = 0.1349, wR <sub>2</sub> = 0.2363                 | R <sub>1</sub> = 0.0866, wR <sub>2</sub> = 0.1975                              |
| Largest diff. peak/hole / e Å <sup>-3</sup> | 1.29/-0.90                                                        | 1.89/-0.96                                                                     |

**Table S2.** Peak assignments of  $^{13}\text{C}$  NMR spectrum of the polyethylenes <sup>a</sup>

| Peak | Attribution                                                                                                   | Peak | Attribution                                                                                               | Peak | Attribution                                                                                                              |
|------|---------------------------------------------------------------------------------------------------------------|------|-----------------------------------------------------------------------------------------------------------|------|--------------------------------------------------------------------------------------------------------------------------|
| 1    | 1B <sub>2</sub>                                                                                               | 12   | $\beta\text{B}_1$ 1,4- $\beta\text{B}_1$<br>1,5- $\beta\text{B}_1$ 1,6- $\beta\text{B}_1$ 4B <sub>5</sub> | 23   | 1,4-brB <sub>1</sub>                                                                                                     |
| 2    | 1B <sub>4</sub> 1B <sub>5</sub> 1B <sub>n</sub>                                                               | 13   | 1,6- $\beta'$ B <sub>1</sub>                                                                              | 24   | $\alpha\text{B}_2$                                                                                                       |
| 3    | 1B <sub>3</sub>                                                                                               | 14   | 3B <sub>4</sub>                                                                                           | 25   | 4B <sub>4</sub>                                                                                                          |
| 4    | 1B <sub>1</sub> 1,5-B <sub>1</sub> 1,6-B <sub>1</sub>                                                         | 15   | 4B <sub>n</sub>                                                                                           | 26   | $\alpha\text{B}_{3-5}$ 5B <sub>5</sub> nB <sub>n</sub> $\alpha\text{B}_n$<br>1,4- $\alpha\text{B}_n$ 1,4-nB <sub>n</sub> |
| 5    | 1,4-1B <sub>1</sub>                                                                                           | 16   | $\delta\text{B}_{1-n}$                                                                                    | 27   | 1,4- $\alpha'$ B <sub>1</sub>                                                                                            |
| 6    | 2B <sub>3</sub>                                                                                               | 17   | $\gamma\text{B}_1$ 1,4- $\gamma\text{B}_1$<br>1,5- $\gamma\text{B}_1$ 1,6- $\gamma\text{B}_1$             | 28   | 3B <sub>3</sub>                                                                                                          |
| 7    | 2B <sub>5</sub> 2B <sub>n</sub> 1,4-2B <sub>n</sub>                                                           | 18   | $\gamma\text{B}_{2-5}$ 1,4- $\gamma\text{B}_n$<br>1,4-(n-2)B <sub>n</sub> $\gamma\text{B}_n$              | 29   | $\alpha\text{B}_1$ 1,4- $\alpha\text{B}_1$ 1,5- $\alpha\text{B}_1$<br>1,6- $\alpha\text{B}_1$ 1,6-a'B <sub>1</sub>       |
| 8    | 2B <sub>4-8</sub>                                                                                             | 19   | 1,4- $\alpha'$ B <sub>n</sub>                                                                             | 30   | brB <sub>3</sub> 1,5- $\alpha'$ B <sub>1</sub>                                                                           |
| 9    | 1,5- $\beta'$ B <sub>1</sub>                                                                                  | 20   | 3B <sub>n</sub> 1,4-3B <sub>n</sub>                                                                       | 31   | brB <sub>4,5,n</sub>                                                                                                     |
| 10   | 2B <sub>2</sub>                                                                                               | 21   | 3B <sub>5</sub>                                                                                           | 32   | 1,4-brB <sub>n</sub>                                                                                                     |
| 11   | $\beta\text{B}_{2-5}$ $\beta\text{B}_n$ (n-1)B <sub>n</sub><br>1,4- $\beta\text{B}_n$ 1,4-(n-1)B <sub>n</sub> | 22   | brB <sub>1</sub> 1,5-brB <sub>1</sub> 1,6-brB <sub>1</sub>                                                | 33   | brB <sub>2</sub>                                                                                                         |

<sup>a</sup>  $^{13}\text{C}$  NMR spectrum of the polyethylenes (**PE<sub>Ni3-60-E2</sub>**) was shown in Figure 12 in manuscript.

**Table S3.** Branching analysis of selected samples of polyethylenes. <sup>a</sup>

| Samples                  | Branches /1000 C's | Methyl branches/% | Ethyl branches/% | Propyl branches/% | Butyl branches/% | Amyl branches/% | Long branches/% | Details         |
|--------------------------|--------------------|-------------------|------------------|-------------------|------------------|-----------------|-----------------|-----------------|
| PE <sub>Ni2-60-M1</sub>  | 81                 | 93.30             | 0.36             | 0.72              | 1.27             | 1.09            | 3.26            | Run 2, Table 2  |
| PE <sub>Ni2-80-M1</sub>  | 83                 | 84.36             | 0.62             | 0.74              | 2.41             | 2.60            | 9.27            | Run 4, Table 2  |
| PE <sub>Ni2-60-E5</sub>  | 122                | 81.22             | 1.99             | 1.75              | 5.67             | 1.40            | 8.07            | Run 2, Table 3  |
| PE <sub>Ni2-80-E5</sub>  | 167                | 83.12             | 1.41             | 3.10              | 6.06             | 1.71            | 4.60            | Run 4, Table 3  |
| PE <sub>Ni2-100-E5</sub> | 119                | 69.76             | 0.09             | 3.05              | 9.22             | 3.60            | 14.27           | Run 6, Table 3  |
| PE <sub>Ni1-60-E2</sub>  | 65                 | 64.58             | 0.44             | 1.15              | 5.73             | 8.11            | 20.00           | Run 8, Table 3  |
| PE <sub>Ni2-60-E2</sub>  | 123                | 65.31             | 0.55             | 2.22              | 10.93            | 4.53            | 16.47           | Run 12, Table 3 |
| PE <sub>Ni3-60-E2</sub>  | 185                | 76.22             | 4.83             | 2.46              | 7.10             | 2.00            | 7.39            | Run 13, Table 3 |
| PE <sub>Ni4-60-E2</sub>  | 48                 | 85.29             | 2.55             | 2.60              | 4.30             | 0.16            | 5.10            | Run 14, Table 3 |
| PE <sub>Ni5-60-E2</sub>  | 97                 | 83.67             | 2.19             | 1.77              | 4.52             | 1.07            | 6.78            | Run15, Table 3  |
| PE <sub>Ni6-60-E2</sub>  | 30                 | 85.68             | 1.98             | 2.31              | 3.99             | 0.62            | 5.41            | Run16, Table 3  |
| PE <sub>Ni7-60-E2</sub>  | 74                 | 82.47             | 0.32             | 0.82              | 5.81             | 1.72            | 8.85            | Run17, Table 3  |
| PE <sub>Ni8-60-E2</sub>  | 180                | 74.89             | 3.37             | 3.15              | 8.46             | 2.18            | 7.95            | Run19, Table 3  |
| <sup>a</sup>             | Data               | determined        | from             | the               | <sup>13</sup> C  | NMR             | spectrum.       |                 |

**Table S4.** Stress-strain properties of the selected polyethylene samples.

| Samples                 | Maximum load /N | Modulus of elasticity /% | Rupture Stress /MPa | Rupture Strain /% |
|-------------------------|-----------------|--------------------------|---------------------|-------------------|
| PE <sub>Ni2-60-M1</sub> | 99.68566        | 31.16010                 | 20.86127            | 989.17561         |
| PE <sub>Ni2-80-M1</sub> | 121.83333       | 25.94073                 | 26.47687            | 1407.09152        |
| PE <sub>Ni1-60-M3</sub> | 35.26493        | 231.10084                | 5.11201             | 441.05134         |
| PE <sub>Ni3-60-M3</sub> | 34.90348        | 3.92895                  | 7.15527             | 945.84150         |
| PE <sub>Ni4-60-M3</sub> | 63.21949        | 327.03846                | 10.63216            | 1357.50637        |
| PE <sub>Ni5-60-M3</sub> | 98.77724        | 25.40926                 | 22.83357            | 1008.34370        |
| PE <sub>Ni2-60-ES</sub> | 55.29499        | 14.95573                 | 12.10514            | 1189.17704        |
| PE <sub>Ni2-80-ES</sub> | 43.55141        | 9.05498                  | 10.36686            | 2019.59190        |
